# Supplementary material for: Multi-Omics and Informatics Analysis of FFPE Tissues Derived from Melanoma Patients with Long/Short Responses to Anti-PD1 Therapy Reveals Pathways of Response
Source: Cancers (Basel). 2020 Nov 26;12(12):3515. doi: 10.3390/cancers12123515 (PMC7768436; doi:10.3390/cancers12123515)
Supplement: Supplementary file 1 [file cancers-12-03515-s001.zip › supplemental_material/Tables_multiomics_11242020.xlsx]

## Sheet: Table_1
Table S1: Clinical Characteristics of FFPE samples												Supplementary Table 1: Characteristics of Patients in Cohort
Patient	ID	Gender	Stage	Study Age	OS (days, *ongoing)	PFS (days, *ongoing)	Used for Protein or RNA?	Response Status (N, CR, PR, Mixed, SD, etc)	Response based on 1 year PFS	Criteria Used to Determine Response	Metastatic Stage (M1a,b,c)	Metastatic Sites (eg., melanoma, liver, brain, etc.)	Prior Rx	Survival time since immuno-oncology therapy (Days)	Alive/Dead	Prior Ipi Therapy (yes/no)	Biopsy collected in relation to Ipi treatment? (Pre Ipi/Post Ipi)	Total time patient had Ipi treatment (days or N/A)	Mutation Status (eg., BRAF)	Anti-PD1 Therapy (Pembro, NIVO, etc) or Ipi/NIVO Combo	Date Difference Months (Biopsy vs PD1 Therapy)	Specimen Location (biopsy site)	Biopsy or Resection	Patient LDH Level	Date Difference LDH to treatment start (Days)
1	18001	MALE	Stage IV	61	3817		Both	PR- Partial response	Good	RECIST	M1c	Pulmonary, Lymph nodes, Peritoneum	interferon-alfa, ipilimumab	911	Alive	Yes	Post ipi	21		Pembrolizumab	3.58081	Jejunum	Resection	149	0.56875
2	18002	FEMALE	Stage IV	61	1147		Both	CR- Complete response	Good	RECIST	M1c	Pulmonary, Hepatic, Brain, Lymph nodes	Abraxane, Paclitaxel, Paraplatin, Carboplatin,Ipilimumab	805	Alive	Yes	Pre ipi	63		Pembrolizumab	8.86991	Skin, Foot	Resection	285	0.544444
3	18003	MALE	Stage IV	44	1322	84	Both	PD- Progressive disease	Poor	RECIST	M1c	Hepatic, Pleura, Peritoneum	Dome, Dacarbazine,Peginterferon alfa, Ipilimumab	364	Dead	Yes	Post ipi	63		Pembrolizumab	11.2352	Lymph Node	Resection	252	0.534722
4	18004	FEMALE	Stage IV	57	1867		Both	PR- Partial response	Good	RECIST	M1b	Pulmonary	Mekinist, Trametinib, Tafinlar, Dabrafenib, Ipilimumab, interferon-alfa	826	Alive	Yes	Pre ipi	63	BRAF V600E	Pembrolizumab	5.74901	Skin, Back	Resection	209	0.381944
5	18005	MALE	Stage IV	60	1077		Both	PR- Partial response	Good	RECIST	M1c	Pulmonary, Hepatic, Brain, Peritoneum		615	Alive	No		N/A		Nivolumab	11.3009	Lung	Resection	226	0.352083
6	18006	FEMALE	Stage IV	41	3953	148	Both	PD- Progressive disease	Poor	RECIST	M1c	Pulmonary, Osseous	Mekinist, Trametinib, Tafinlar, Dabrafenib	526	Alive	No	Pre ipi	63	BRAF V600E	Pembrolizumab	10.9724	Lymph Nodes, Groin	Resection	166	0.361806
7	18007	MALE	Stage IV	58	2858	161	Protein	PD- Progressive disease	Poor	RECIST	M1c	Pulmonary, Hepatic, Brain, Skin, Other	Ipilimumab	563	Alive	Yes	Pre ipi	94		Pembrolizumab	9.98686	Colon	Resection	126	0.345139
8	18008	MALE	Stage IV	68	1346	161	Both	PD- Progressive disease	Poor	RECIST	M1c	Other	Ipilimumab	763	Alive	Yes	Post ipi	66	BRAF V600E	Pembrolizumab	2.92378	Jejunum	Resection	147	0.395139
9	18009	FEMALE	Stage IV	79	572	81	Both	PD- Progressive disease	Poor	RECIST	M1a	Lymph nodes		238	Dead	No	Pre ipi	18		Pembrolizumab	6.99737	Lymph Node	Resection	187	0.535417
10	18010	MALE	Stage IV	66	2194	155	Both	PD- Progressive disease	Poor	RECIST	M1c	Peritoneum		712	Alive	No	Pre ipi	1		Pembrolizumab	1.11695	Ileum	Resection	182	0.326389
11	18011	MALE	Stage IV	58	2536		RNA	CR- Complete response	Good	RECIST	M1b	Pulmonary, Skin	Abraxane, Paclitaxel,Temozolomide	2009	Alive	No		N/A	HLA-A2	Nivolumab	1.31406	Shoulder	Biopsy	n/a	n/a
12	18013	MALE	Stage IV	41	2389	84	Both	PD- Progressive disease	Poor	Clinical	M1c	Lymph nodes	Tafinlar, Dabrafenib,Trametinib, ipilimumab	869	Alive	Yes	Post ipi	63	BRAF V600E	Pembrolizumab	9.36268	Leg	Resection	178	0.340972
13	18015	FEMALE	Stage IV	52	4321		Both	PR- Partial response	Good	RECIST	M1c	Pulmonary, Hepatic, Peritoneum	Ipilimumab	748	Alive	Yes	Post ipi	61		Pembrolizumab	11.0381	Arm	Resection	206	0.523611
14	18016	FEMALE	Stage IV	58	2810		Both	CR- Complete response	Good	RECIST	M1c	PulmonaryPeritoneum	Interleukin 2, ipilimumab	903	Alive	Yes	Post ipi	21		Pembrolizumab	5.15769	Lung	Resection	161	0.544444
15	18017	MALE	Stage IV	59	1454	453	Protein	PD- Progressive disease	Good	RECIST	M1c	Lymph nodes		630	Alive	No		N/A		Pembrolizumab	11.728	Lung	Resection	214	0.406944
16	18018	MALE	Stage IV	69	470	83	Both	PD- Progressive disease	Poor	RECIST	M1a	Lymph nodes	Ipilimumab	100	Dead	Yes	Pre ipi	63		Pembrolizumab	11.4323	Arm	Resection	152	0.576389
17	18020	MALE	Stage IIIC	64	2105	71	Both	PD- Progressive disease	Poor	RECIST	n/a	n/a		390	Dead	No		N/A		Pembrolizumab	8.04862	Elbow	Resection	166	0.346528
18	18021	MALE	Stage IIIC	83	561		Both	PR- Partial response	Good	RECIST	n/a	n/a		364	Alive	No		N/A		Pembrolizumab	5.45335	Scalp	Resection	205	0.368056
19	18023	MALE	Stage IV	75	442	67	RNA	PD- Progressive disease	Poor	Clinical	M1c	Pulmonary, Osseous, Hepatic	Ipilimumab	181	Dead	Yes	Post ipi	64		Pembrolizumab	0.525624	Femur	Biopsy	n/a	n/a
20	18024	MALE	Stage IV	59	921	83	Both	PD- Progressive disease	Poor	RECIST	M1c	Brain, Peritoneum	Tafinlar, Dabrafenib,Trametinib, ipilimumab	141	Dead	Yes	Post ipi	63	BRAF V600E	Pembrolizumab	1.44547	Frontal Lobe	Biopsy	304	0.596528
21	18025	MALE	Stage IV	35	1923		RNA	PR- Partial response	Good	RECIST	M1c	Pulmonary, Brain	Mekinist, Trametinib, Tafinlar, Dabrafenib	622	Alive	No		N/A	BRAF V600E	Pembrolizumab	7.6544	Frontal Lobe	Resection	226	0.320139
22	18029	MALE	Stage IV	76	790		Both	PR- Partial response	Good	Clinical	M1b	Pulmonary		462	Alive	No		N/A		Pembrolizumab	8.47569	Neck	Resection	146	0.384722
23	18031	MALE	Stage IV	55	6160		RNA	SD- Stable disease	Good	Clinical	M1c	Brain	interferon-alfa, ipilimumab	511	Alive	Yes	Post ipi	101		Pembrolizumab	4.07359	Cerebellum	Biopsy	202	0.359722
24	18032	MALE	Stage IV	62	1044		RNA	CR- Complete response	Good	Clinical	M1a	Lymph nodes		646	Alive	No		N/A		Pembrolizumab	1.41261	Leg	Biopsy	168	0.491667
25	18033	MALE	Stage IIIC	61	1485		RNA	CR- Complete response	Good	RECIST	n/a	n/a		604	Alive	No		N/A	BRAF V600K	Pembrolizumab	2.49671	Lower Back	Biopsy	201	0.361111
26	18035	MALE	Stage IV	69	1456		RNA	PR- Partial response	Good	RECIST	M1c	Pulmonary, Lymph nodes		612	Alive	No		N/A		Pembrolizumab	0.558476	Jejunum	Resection	138	0.323611
27	18038	MALE	Stage IIIC	85	1062	83	RNA	PD- Progressive disease	Poor	Clinical	n/a	n/a		308	Alive	No		N/A		PEMBROLIZUMAB	1.37976	Cheek	Biopsy	181	68.4972

## Sheet: Table_2
Table S2: Distribution of FFPE samples for multiomics study
Dataset	Total samples	Poor responders	Good responders
Proteomics	19	10	9
Targeted-mRNA	25	11	14

## Sheet: Table_3
Table S3: Expression proteomics list
Gene ID	Expr. Log Ratio	Expr. P-value
KLB	6.32269	0.00754544
AFDN-AS1	4.36283	0.00157952
PHLPP1	3.77479	0.008632
PLP2	3.50499	0.0406553
HLA-C	3.3144	0.0311108
HLA-DPB1	3.25522	0.0298112
NAV2	3.21348	0.0388682
HLA-C	3.16546	1.34506e-06
PTX3	3.04844	0.0445131
MDN1	3.01122	0.0184584
HLA-B	2.87792	0.0184035
CC2D1A	2.57607	0.00827847
SIGLEC1	2.50362	0.00482056
TRIP12	2.49244	0.0179298
UBE3C	2.37219	0.00592606
TSTD1	2.33917	0.0146286
HLA-DRB1	2.30712	0.0317756
PHGDH	2.29542	0.0212884
GBP1	2.2386	0.00555367
IRF9	2.2269	0.00521438
RIC8A	2.19382	0.041222
NDUFA7	2.18866	0.0225305
ARL6IP4	2.12923	0.0291137
RSU1	2.12419	0.0310478
C1orf116	2.06958	0.0263442
DSC2	2.06862	0.00222816
MRPS27	1.983	0.0490187
HCFC2	1.95805	0.00662445
GAR1	1.95594	0.0434061
WIPF2	1.92819	0.00523911
RALGAPB	1.92535	0.0262109
BRAT1	1.92317	0.0292765
ACAD10	1.90788	0.0158606
FAM192A	1.89187	0.011359
ROCK2	1.87707	0.0371915
NFKB2	1.86191	0.00771329
ADGRB2	1.84497	0.000400736
CNRIP1	1.78367	0.018677
CCDC93	1.78187	0.0413365
CMC2	1.76628	0.0172089
STAT1	1.74956	0.00267548
HLA-DQA2	1.7142	0.043914
HLA-DRA	1.7142	0.043914
ATG3	1.69902	0.0204055
CYB5A	1.67458	0.0253838
TNRC6B	1.66556	0.0309136
ALDH3A2	1.65333	0.0102149
HLA-DPA1	1.64945	0.00979765
STK10	1.63402	0.0203407
DPM1	1.63196	0.03565
PSME1	1.6284	0.0288421
APOBR	1.62135	0.000598132
ANKIB1	1.62004	0.0245605
OARD1	1.61404	0.011935
CPT2	1.57972	0.0274941
GTPBP1	1.5704	0.0124293
PCDHB10	1.55919	0.0173847
PCDHB11	1.55919	0.0173847
PCDHB13	1.55919	0.0173847
PCDHB14	1.55919	0.0173847
PCDHB15	1.55919	0.0173847
PCDHB16	1.55919	0.0173847
PCDHB2	1.55919	0.0173847
PCDHB3	1.55919	0.0173847
PCDHB4	1.55919	0.0173847
PCDHB7	1.55919	0.0173847
PCDHB8	1.55919	0.0173847
PCDHB9	1.55919	0.0173847
EHMT1	1.55885	0.0467684
LSP1	1.55534	0.0289182
FAM91A1	1.50866	0.0401902
DNPH1	1.50558	0.0187613
TRRAP	1.48846	0.0241393
LTBP4	1.47309	0.0203667
ELP3	1.46161	0.0131497
PLCB4	1.45328	0.00712957
THOC2	1.37242	0.0326879
PSMC2	1.35092	0.0246108
TBK1	1.32699	0.0110734
ALAD	1.29034	0.0369109
FERMT3	1.2846	0.0278383
PPP5C	1.28307	0.0162863
LSS	1.27979	0.0222955
GCDH	1.27892	0.0186155
GMFG	1.26461	0.0362953
EIF2S3	1.17268	0.0430259
LOC255308	1.17268	0.0430259
ICAM3	1.1509	0.0361567
PPP2R2A	1.1224	0.0225346
PPP2R2B	1.1224	0.0225346
EBF1	1.11093	0.00620158
EBF2	1.11093	0.00620158
EBF3	1.11093	0.00620158
CFAP20	1.1095	0.0481706
DNPEP	1.09178	0.0194329
PTPN14	1.01876	0.00552238
WASF2	1.00293	0.0320951
CBR1	0.996253	0.032656
MRE11	0.977044	0.0483265
TRMT61A	0.918715	0.0329691
DNAJB1	0.916946	0.0354056
PSME2	0.895045	0.0446073
PYM1	0.886976	0.0255555
C9orf142	0.879695	0.0215209
RPS27L	0.872942	0.0439005
TMEM245	0.861469	0.012372
PRAMEF19	0.858015	0.0481078
PRAMEF22	0.858015	0.0481078
HGS	0.848569	0.0419545
GRB2	0.752179	0.0220807
DNM2	0.744153	0.027926
DNM3	0.744153	0.027926
ELAVL1	0.638102	0.019383
ELAVL2	0.638102	0.019383
ELAVL4	0.638102	0.019383
RPS13	0.60554	0.0169768
HNRNPF	0.603404	0.0206538
SHOC2	-0.594236	0.0450605
POLR2D	-0.660966	0.0273965
SEC61B	-0.664977	0.0113162
TACC2	-0.698068	0.0128216
PRKD3	-0.713346	0.0169391
LMNA	-0.714854	0.032106
CACNA1B	-0.776833	0.0495343
LRRC57	-0.777254	0.0342169
SZT2	-0.80684	0.030768
TIMM13	-0.811029	0.0369973
DNAJC14	-0.818379	0.0315334
GFPT1	-0.833751	0.0402744
SH2D4A	-0.860399	0.0331131
SPRED2	-0.887193	0.0358713
BCAS2	-0.897919	0.0396174
NIT1	-0.908815	0.0266092
LMNB1	-0.915865	0.048733
AIMP2	-0.929036	0.0214498
NDUFA6	-0.947381	0.00486773
KCNAB1	-0.953308	0.0414878
THTPA	-0.955912	0.0256192
EMD	-0.96348	0.0412949
BAHCC1	-0.967535	0.0369292
FMNL3	-0.971827	0.0242988
KCMF1	-0.977326	0.0399161
DHRS13	-1.00401	0.0426739
CMAS	-1.02236	0.0263172
SSR3	-1.03701	0.0376488
EIF2B4	-1.03964	0.0158743
ARMC8	-1.05146	0.0300968
PDLIM5	-1.06113	0.0275254
CENPC	-1.08708	0.000856263
ADSL	-1.09394	0.0327716
MAGEA1	-1.10689	0.0402619
MAGEA8	-1.10689	0.0402619
MAGEB16	-1.10689	0.0402619
MAGEB17	-1.10689	0.0402619
MAGEB18	-1.10689	0.0402619
MAGEC1	-1.10689	0.0402619
GPRC6A	-1.12188	8.1682e-05
CCT5	-1.13717	0.0287352
SQSTM1	-1.15963	0.0485134
SLC12A9	-1.16931	0.0455646
VWF	-1.19957	0.0222598
CFI	-1.21167	0.0354768
CALD1	-1.21513	0.0224822
ARF5	-1.22761	0.0444013
SERPINH1	-1.25191	0.0036662
MPP2	-1.28204	0.0257114
CGGBP1	-1.35359	0.0145862
BRIX1	-1.38792	0.031087
SUPT16H	-1.39157	0.0378259
EMILIN1	-1.39771	0.0339348
MTHFD1L	-1.44701	0.00834177
CAAP1	-1.48576	0.0484801
TOR1AIP1	-1.49791	0.0384267
FAH	-1.51511	0.0457845
SMARCC1	-1.51958	0.0475829
RBBP9	-1.54614	0.0192838
WFS1	-1.5476	0.0488433
JMJD6	-1.59066	0.0360153
ZCCHC24	-1.59436	0.0400224
LIX1L	-1.61615	0.0319317
LGMN	-1.61917	0.0026133
CCDC57	-1.6344	0.0100334
SLC35B2	-1.65759	0.0177274
HTATSF1	-1.66076	0.0406852
UNK	-1.6713	0.049746
DNM1L	-1.77459	0.0434033
MRPL44	-1.79956	0.00279278
PDHX	-1.83026	0.0466729
ERGIC1	-1.84945	0.0196031
VSTM2L	-1.8535	0.0015743
KDELC2	-1.90843	0.0327578
GOLT1B	-1.91509	0.0231855
SUGP1	-1.96303	0.0437796
ENAH	-1.96861	0.020723
HEXA	-1.99967	0.00769574
RSRP1	-2.00956	0.0392676
APOA5	-2.01389	0.00465718
KANK2	-2.01702	0.0331337
MPRIP	-2.04558	0.0104325
SLC7A5	-2.07203	0.0349697
MFF	-2.11438	0.0148884
PUS1	-2.13448	0.0402259
CPNE2	-2.15131	0.0213138
RAB27A	-2.24034	0.0277058
RAB27B	-2.24034	0.0277058
MLPH	-2.35235	0.0345982
CFAP57	-2.45285	0.0313542
MOV10	-2.48626	0.0239153
NCBP1	-2.54972	0.0306111
PTRH2	-2.68244	0.00166334
KDM6B	-2.7116	0.0261947
PSME3	-2.7579	0.0214811
COA3	-2.76632	0.00606234
VPS36	-2.94465	0.00588031
CBR3	-2.95221	0.00735478
LAT2	-3.2099	0.0450139
NEDD4L	-3.44858	0.00832715
FABP1	-3.69767	0.0225984
FES	-3.98174	0.0356417
RANBP17	-4.13131	0.0314231
HOOK2	-4.70878	0.0229203
LRRC7	-4.88572	0.0193288
MERTK	-5.56354	0.0447928
	Upregulated
	Downregulated

## Sheet: Table_4
Table S4: Targeted mRNA list
Gene ID	Expr. Log Ratio	Expr. P-value
L1CAM	2.51145	0.00449156
IFNB1	1.64412	0.0136632
CX3CR1	1.46675	0.00894832
TBX21	1.26777	0.00647258
FLT3	1.18274	0.0057324
TNF	1.12151	0.00470316
IL12B	1.45649	0.0202382
CD274	1.20619	0.0101328
IL23A	1.18052	0.0106331
CAMP	1.29407	0.0173543
TLR8	1.07947	0.00809502
FASLG	1.2703	0.0179793
TLR2	1.00734	0.0110143
IFI27	1.26113	0.0323584
RORC	1.2118	0.029278
EOMES	1.13706	0.023623
ICAM4	1.2152	0.0390805
IRGM	1.2003	0.0395783
GZMM	0.957294	0.018954
CCL3	1.04291	0.0293836
TAL1	0.920363	0.0224431
SPN	0.909772	0.0216287
CSF2	1.08247	0.0423666
ADORA2A	0.859145	0.021503
TLR5	0.803713	0.0174696
KLRD1	0.965194	0.0372638
FCGR1B	0.979859	0.0412651
MSH5	0.701725	0.0189476
IKBKG	0.814362	0.0366482
TGFB2	0.877521	0.0469316
CCND3	0.866856	0.0469483
PTPRC	0.781551	0.0364917
IFNAR1	0.76906	0.0351048
CD33	0.772957	0.0362587
JAK2	0.631186	0.0214125
TAP2	0.761867	0.0420919
TNFSF8	0.720808	0.0381845
ABL2	0.605445	0.0299979
DST	0.651692	0.0398368
MAPK8	0.636668	0.0424389
	Upregulated

## Sheet: Table_5
	Table S5: Top five Network lists analyzed by network building via MetaCore that are enriched in proteomics data
	#	Main Players in Network	GO processes (GO public biological processes by main players in Network)	Total nodes	Seed nodes	Pathways	p-Value	zScore	gScore
	Network list: Analyze networks
	1	GRB2, ANKIB1, WFS1, MHC class II, CGGBP1	positive regulation of response to stimulus (70.0%; 2.012e-18), MAPK cascade (36.0%; 1.707e-17), signal transduction by protein phosphorylation (36.0%; 3.756e-17), positive regulation of signal transduction (56.0%; 1.092e-15), positive regulation of cell communication (58.0%; 1.159e-15)	50	14	56	1.68e-29	55.62	125.62
	2	UBE3C, PPP2R2A, 1B59, HLA-B Cw-5, HLA-B55	antigen processing and presentation of exogenous peptide antigen via MHC class I, TAP-independent (48.0%; 1.215e-46), antigen processing and presentation of endogenous peptide antigen via MHC class I via ER pathway, TAP-independent (48.0%; 4.651e-45), antigen processing and presentation of endogenous peptide antigen via MHC class Ib (48.0%; 1.066e-44), antigen processing and presentation of endog…	50	26	0	7.9e-63	104.57	104.57
	3	Emerin, GTL3, ARF5, HLA-B54, FMNL3	antigen processing and presentation of exogenous peptide antigen via MHC class I, TAP-independent (45.8%; 3.722e-42), antigen processing and presentation of endogenous peptide antigen via MHC class I via ER pathway, TAP-independent (45.8%; 1.003e-40), antigen processing and presentation of endogenous peptide antigen via MHC class Ib (45.8%; 2.124e-40), antigen processing and presentation of endog…	50	21	0	4.15e-48	83.56	83.56
	4	C6orf130, CREB1, HLA-DOB, CCG8, RPS30	T cell receptor signaling pathway (64.6%; 1.799e-48), antigen processing and presentation of exogenous peptide antigen via MHC class II (58.3%; 2.528e-47), antigen processing and presentation of peptide antigen via MHC class II (58.3%; 3.508e-47), antigen processing and presentation of peptide or polysaccharide antigen via MHC class II (58.3%; 6.677e-47), antigen receptor-mediated signaling pathw…	50	19	0	3.08e-43	77.97	77.97
	5	HLA-B58, SARG, HLA-B18, 1B82, BAI2	antigen processing and presentation of exogenous peptide antigen via MHC class I, TAP-independent (42.9%; 1.901e-39), antigen processing and presentation of endogenous peptide antigen via MHC class I via ER pathway, TAP-independent (42.9%; 4.308e-38), antigen processing and presentation of endogenous peptide antigen via MHC class Ib (42.9%; 8.778e-38), antigen processing and presentation of endog…	50	17	0	3.05e-37	67.6	67.6
	Network list: Analyze networks (Receptors)
	1	alpha-V/beta-3 integrin, PPAR-gamma/RXR-alpha, ER81, ATF/CREB, NF-kB p50/p50, NF-kB p50/p65, CREB1, Elk-1, NF-kB, PPAR-alpha, PPAR-gamma, STAT1, SMAD4, c-Fos, c-Jun, SMAD3, GATA-3, PPAR-alpha/RXR-alpha, MEF2A, MEF2C	antigen processing and presentation of exogenous peptide antigen via MHC class I, TAP-independent (16.0%; 1.697e-53), antigen processing and presentation of endogenous peptide antigen via MHC class I via ER pathway, TAP-independent (16.0%; 9.761e-51), antigen processing and presentation of endogenous peptide antigen via MHC class Ib (16.0%; 4.069e-50), antigen processing and presentation of endog…	254	165	93	0	292.88	409.13
	2	KLRA1, NF-kB p50/p65, NF-kB, STAT1, c-Myc, IRF9, IRF1	antigen processing and presentation of exogenous peptide antigen via MHC class I, TAP-independent (27.7%; 2.360e-87), antigen processing and presentation of endogenous peptide antigen via MHC class I via ER pathway, TAP-independent (27.7%; 4.039e-83), antigen processing and presentation of endogenous peptide antigen via MHC class Ib (27.7%; 3.485e-82), antigen processing and presentation of endog…	186	161	18	0	332.75	355.25
	3	GP-IB alpha, STAT1, c-Myc, FOXM1	regulation of protein metabolic process (36.7%; 2.122e-07), regulation of cellular protein metabolic process (34.9%; 4.061e-07), nitrogen compound metabolic process (60.6%; 7.515e-07), cellular nitrogen compound biosynthetic process (23.9%; 6.522e-06), cellular nitrogen compound metabolic process (36.7%; 7.933e-06)	112	105	1	6.41e-303	279.65	280.9
	4	LRP1, PPAR-alpha, PPAR-alpha/RXR-alpha, HNF4-alpha	positive regulation of fatty acid metabolic process (14.6%; 5.408e-09), positive regulation of fatty acid beta-oxidation (9.8%; 1.534e-08), positive regulation of lipid catabolic process (12.2%; 4.471e-08), positive regulation of fatty acid oxidation (9.8%; 1.458e-07), regulation of fatty acid beta-oxidation (9.8%; 1.699e-07)	49	40	0	7.35e-111	166.19	166.19
	5	ITGB1, c-Jun/FosB, AP-1, c-Jun	regulation of immune response (63.6%; 1.713e-26), leading edge cell differentiation (18.2%; 2.714e-26), negative regulation of transcription from RNA polymerase II promoter in response to endoplasmic reticulum stress (18.2%; 7.358e-24), cellular response to potassium ion starvation (18.2%; 1.959e-23), response to cytokine (60.0%; 4.652e-23)	55	36	2	1.63e-92	139.29	141.79
	Network list: Analyze networks (Trancription Factors)
	1	MIST1, ITGB1, KLRA1	antigen processing and presentation of exogenous peptide antigen via MHC class I, TAP-independent (16.1%; 1.060e-70), antigen processing and presentation of endogenous peptide antigen via MHC class I via ER pathway, TAP-independent (16.1%; 9.511e-67), antigen processing and presentation of endogenous peptide antigen via MHC class Ib (16.1%; 7.147e-66), antigen processing and presentation of endog…	313	261	9	0	417.25	428.5
	2	SP2, ITGB1, KLRA1	antigen processing and presentation of exogenous peptide antigen via MHC class I, TAP-independent (16.6%; 2.583e-71), antigen processing and presentation of endogenous peptide antigen via MHC class I via ER pathway, TAP-independent (16.6%; 2.328e-67), antigen processing and presentation of endogenous peptide antigen via MHC class Ib (16.6%; 1.751e-66), antigen processing and presentation of endog…	307	262	4	0	422.96	427.96
	3	GATA-5, ITGB1, KLRA1	antigen processing and presentation of exogenous peptide antigen via MHC class I, TAP-independent (16.8%; 1.046e-71), antigen processing and presentation of endogenous peptide antigen via MHC class I via ER pathway, TAP-independent (16.8%; 9.451e-68), antigen processing and presentation of endogenous peptide antigen via MHC class Ib (16.8%; 7.114e-67), antigen processing and presentation of endog…	300	251	8	0	409.91	419.91
	4	SOX17, KLRA1	antigen processing and presentation of exogenous peptide antigen via MHC class I, TAP-independent (15.5%; 6.570e-53), antigen processing and presentation of endogenous peptide antigen via MHC class I via ER pathway, TAP-independent (15.5%; 3.764e-50), antigen processing and presentation of exogenous peptide antigen via MHC class I, TAP-dependent (18.4%; 4.061e-50), antigen processing and presenta…	256	220	16	0	387.62	407.62
	5	BARX2, ITGB1, KLRA1	antigen processing and presentation of exogenous peptide antigen via MHC class I, TAP-independent (17.1%; 4.163e-72), antigen processing and presentation of endogenous peptide antigen via MHC class I via ER pathway, TAP-independent (17.1%; 3.772e-68), antigen processing and presentation of endogenous peptide antigen via MHC class Ib (17.1%; 2.841e-67), antigen processing and presentation of endog…	297	240	9	0	393.91	405.16
	Network list: Trancription Regulation
	1	SOX17	cellular metabolic process (61.9%; 3.504e-07), mitochondrial fragmentation involved in apoptotic process (2.9%; 8.625e-07), metabolic process (65.5%; 8.736e-07), organic substance metabolic process (61.9%; 1.733e-06), fibroblast growth factor receptor signaling pathway (5.0%; 1.751e-06)	146	145	0	0	338.29	338.29
	2	CREB1	antigen processing and presentation of exogenous peptide antigen via MHC class I, TAP-independent (30.1%; 2.566e-63), antigen processing and presentation of endogenous peptide antigen via MHC class I via ER pathway, TAP-independent (30.1%; 1.251e-60), antigen processing and presentation of endogenous peptide antigen via MHC class Ib (30.1%; 5.040e-60), antigen processing and presentation of endog…	129	128	0	0	317.68	317.68
	3	GATA-1	regulation of protein metabolic process (32.8%; 4.347e-06), cellular process (93.6%; 6.330e-06), regulation of cellular protein metabolic process (31.2%; 6.605e-06), regulation of macromolecule metabolic process (52.0%; 3.085e-05), regulation of peroxisome organization (1.6%; 8.693e-05)	129	128	0	0	317.68	317.68
	4	ETS1	cellular nitrogen compound metabolic process (39.5%; 1.076e-07), regulation of cellular protein metabolic process (33.6%; 6.093e-07), heterocycle metabolic process (34.5%; 9.011e-07), regulation of protein metabolic process (34.5%; 1.046e-06), nucleobase-containing compound metabolic process (32.8%; 1.227e-06)	125	124	0	0	312.64	312.64
	5	TAL1	fibroblast growth factor receptor signaling pathway (5.0%; 1.036e-05), regulation of protein metabolic process (30.8%; 5.711e-05), regulation of peroxisome organization (1.7%; 8.010e-05), regulation of cellular protein metabolic process (29.2%; 9.090e-05), cellular response to fibroblast growth factor stimulus (5.0%; 1.166e-04)	125	124	0	0	312.64	312.64

## Sheet: Table_6
Table S6: Top five Network lists analyzed by network building via MetaCore that are enriched in targeted-mRNA data
	#	Main Players in Network	GO processes (GO public biological processes by main players in Network)	Total nodes	Seed nodes	Pathways	p-Value	zScore	gScore
	Network list: Analyze networks
	1	JAK2, IKK-gamma, Fc gamma RI, TAP1 (PSF1), TNF-alpha	cytokine-mediated signaling pathway (79.2%; 1.508e-43), response to cytokine (87.5%; 1.329e-40), cellular response to cytokine stimulus (83.3%; 5.752e-39), I-kappaB kinase/NF-kappaB signaling (41.7%; 2.570e-35), cellular response to organic substance (95.8%; 3.740e-34)	52	7	103	5.72e-18	61.33	190.08
	2	JNK(MAPK8-10), JAK2, MAPK8/9, Adenosine A2a receptor, IL-23	cytokine-mediated signaling pathway (61.2%; 3.764e-29), cell surface receptor signaling pathway (81.6%; 2.698e-26), response to external stimulus (85.7%; 3.012e-26), cellular response to cytokine stimulus (65.3%; 1.199e-25), response to lipopolysaccharide (51.0%; 1.802e-25)	50	10	7	5.69e-27	88.54	97.29
	3	TLR5, CAMP, MSH5, CD45, IL-23	response to stress (93.5%; 3.076e-25), inflammatory response (52.2%; 4.036e-23), positive regulation of locomotion (52.2%; 1.210e-22), positive regulation of response to stimulus (78.3%; 1.160e-21), regulation of response to external stimulus (60.9%; 1.535e-21)	50	9	0	6.31e-24	79.67	79.67
	4	TAL1, VAMP5, IGFRB, Granzyme M, ZNF828	G protein-coupled receptor signaling pathway, coupled to cyclic nucleotide second messenger (54.2%; 3.403e-35), adenylate cyclase-modulating G protein-coupled receptor signaling pathway (50.0%; 9.877e-33), adenylate cyclase-inhibiting G protein-coupled receptor signaling pathway (39.6%; 6.467e-32), regulation of amine transport (37.5%; 3.859e-26), phospholipase C-activating G protein-coupled rece…	50	8	0	5.08e-21	71.53	71.53
	5	TAL1, Delta-type opioid receptor, Tip60, Beta-2 adrenergic receptor, EP400	response to temperature stimulus (44.0%; 1.108e-27), response to abiotic stimulus (72.0%; 1.631e-27), response to stress (88.0%; 3.420e-23), cellular response to stress (68.0%; 1.504e-22), positive regulation of protein metabolic process (66.0%; 3.562e-21)	50	8	0	6.04e-21	70.81	70.81
	Network list: Analyze networks (Receptors)
	1	CCR3, NF-kB p50/c-Rel, NF-kB p52/p65, LRRFIP1, NF-kB1 (p105), TR-beta, NF-I, Bcl-6, PPAR-gamma/RXR-alpha, STAT5A, SP1/SP3 complex, ESR, C/EBP, ROR-alpha, NF-kB p65/p65, NF-kB p50/RelB, NF-kB1 (p50), ATF/CREB, ELF4, NF-kB p50/p50, HAF1, IRF4, NF-kB p65/c-Rel, NF-kB p50/p65, LXR-alpha, NF-kB2 (p52), AP-1, CREB1, ATF-2, ESR2 (nuclear), Elk-1, NF-AT, NF-AT4(NFATC3), NF-kB, PPAR-gamma, SHP, STAT1, STA…	positive regulation of nitrogen compound metabolic process (83.1%; 9.775e-106), positive regulation of cellular metabolic process (83.9%; 3.519e-104), positive regulation of macromolecule metabolic process (83.9%; 4.017e-104), positive regulation of metabolic process (85.2%; 2.527e-101), response to cytokine (61.9%; 4.317e-101)	255	49	1187	9.06e-136	196.07	1679.82
	2	FPRL1, NF-kB p50/c-Rel, NF-kB p52/p65, NF-kB1 (p105), NF-I, Bcl-6, PPAR-gamma/RXR-alpha, STAT5A, SP1/SP3 complex, NF-kB p65/p65, NF-kB p50/RelB, NF-kB1 (p50), ATF/CREB, ELF4, NF-kB p50/p50, HAF1, IRF4, NF-kB p65/c-Rel, NF-kB p50/p65, LXR-alpha, NF-kB2 (p52), AP-1, CREB1, ATF-2, Elk-1, NF-AT, NF-AT4(NFATC3), NF-kB, PPAR-gamma, STAT1, STAT3, STAT4, STAT5, c-Jun, NF-kB2 (p100), p53, RAR, VDR, AML1 (…	positive regulation of nitrogen compound metabolic process (83.5%; 4.458e-105), positive regulation of macromolecule metabolic process (84.4%; 1.483e-103), positive regulation of cellular metabolic process (84.0%; 3.050e-102), positive regulation of metabolic process (85.3%; 1.557e-99), response to cytokine (61.9%; 4.615e-99)	249	51	1174	1.34e-143	206.63	1674.13
	3	CCR4, NF-kB p50/c-Rel, NF-kB p52/p65, NF-kB1 (p105), NF-I, Bcl-6, STAT5A, SP1/SP3 complex, NF-kB p65/p65, NF-kB p50/RelB, NF-kB1 (p50), ATF/CREB, ELF4, NF-kB p50/p50, HAF1, IRF4, NF-kB p65/c-Rel, NF-kB p50/p65, LXR-alpha, NF-kB2 (p52), AP-1, CREB1, ATF-2, Elk-1, NF-AT, NF-AT4(NFATC3), NF-kB, PPAR-gamma, STAT1, STAT3, STAT4, STAT5, c-Jun, NF-kB2 (p100), p53, c-Myc, STAT2, SP1, TFII-I, IRF1, LXR-al…	response to cytokine (65.9%; 8.374e-102), positive regulation of nitrogen compound metabolic process (83.4%; 1.327e-95), positive regulation of cellular metabolic process (83.9%; 3.844e-93), positive regulation of macromolecule metabolic process (83.9%; 4.324e-93), cell surface receptor signaling pathway (75.4%; 1.668e-91)	228	47	1163	2.36e-131	199.38	1653.13
	4	G3P2, NF-kB p50/c-Rel, NF-kB p52/p65, NF-kB1 (p105), Bcl-6, STAT5A, SP1/SP3 complex, NF-kB p65/p65, NF-kB p50/RelB, NF-kB1 (p50), ATF/CREB, NF-kB p50/p50, NF-kB p65/c-Rel, NF-kB p50/p65, LXR-alpha, NF-kB2 (p52), AP-1, ATF-2, Elk-1, NF-AT, NF-AT4(NFATC3), NF-kB, PPAR-gamma, STAT1, STAT3, STAT4, STAT5, c-Jun, NF-kB2 (p100), p53, STAT2, SP1, LXR-alpha/RXR-alpha, STAT1/STAT2, STAT6, ATF-2/c-Jun, c-Ju…	positive regulation of nitrogen compound metabolic process (87.9%; 1.385e-89), positive regulation of cellular metabolic process (89.0%; 2.709e-89), positive regulation of macromolecule metabolic process (88.4%; 1.019e-87), positive regulation of metabolic process (89.6%; 2.113e-85), response to cytokine (66.5%; 6.608e-85)	192	40	1144	1.14e-110	185.7	1615.7
	5	TNF-R1, NF-kB p50/c-Rel, NF-kB p52/p65, NF-kB1 (p105), NF-I, Bcl-6, STAT5A, SP1/SP3 complex, NF-kB p65/p65, NF-kB p50/RelB, NF-kB1 (p50), ATF/CREB, NF-kB p50/p50, NF-kB p65/c-Rel, NF-kB p50/p65, LXR-alpha, NF-kB2 (p52), AP-1, CREB1, ATF-2, Elk-1, NF-AT, NF-AT4(NFATC3), NF-kB, PPAR-gamma, STAT1, STAT3, STAT4, STAT5, c-Fos, c-Jun, NF-kB2 (p100), p53, c-Myc, STAT2, SP1, TFII-I, LXR-alpha/RXR-alpha, …	positive regulation of nitrogen compound metabolic process (87.1%; 4.669e-90), positive regulation of cellular metabolic process (87.1%; 1.140e-86), positive regulation of macromolecule metabolic process (87.1%; 1.265e-86), response to cytokine (65.7%; 1.634e-85), positive regulation of metabolic process (87.6%; 1.074e-82)	192	46	1084	6.81e-132	213.59	1568.59
	Network list: Analyze networks (Trancription Factors)
	1	CDX2, TGF-beta receptor type I, CSF2RA, CCBP2 (CCR9), IL-12RB1, TNF-R1 soluble, IL23R, TNF-R2 soluble, G3P2, IL-23 receptor, DcR3(TNFRSF6B), FasR(CD95), GM-CSF receptor, TGF-beta receptor type II, TNF-R2, TNF-R1, CD30(TNFRSF8), CSF2RB, TGF-beta receptor type III (betaglycan)	cell surface receptor signaling pathway (79.7%; 1.305e-84), intracellular signal transduction (67.4%; 3.190e-75), response to cytokine (62.2%; 1.782e-74), cellular response to organic substance (79.1%; 3.246e-74), positive regulation of nitrogen compound metabolic process (80.8%; 4.155e-72)	192	41	1004	1.77e-113	187.28	1442.28
	2	LITAF, TGF-beta receptor type I, TNF-R1 soluble, TNF-R2 soluble, G3P2, DcR3(TNFRSF6B), FasR(CD95), TGF-beta receptor type II, TNF-R2, TNF-R1, CD30(TNFRSF8), TGF-beta receptor type III (betaglycan)	response to cytokine (67.8%; 8.898e-62), regulation of immune system process (72.7%; 6.400e-59), I-kappaB kinase/NF-kappaB signaling (29.8%; 2.141e-57), positive regulation of response to stimulus (79.3%; 1.144e-56), positive regulation of nitrogen compound metabolic process (84.3%; 1.171e-56)	137	38	945	9.28e-110	206.4	1387.65
	3	IRF7, TGF-beta receptor type I, CSF2RA, IL-12RB1, TNF-R1 soluble, IL23R, TNF-R2 soluble, G3P2, IL-23 receptor, DcR3(TNFRSF6B), FasR(CD95), GM-CSF receptor, TNF-R2, TNF-R1, CD30(TNFRSF8), CSF2RB, TGF-beta receptor type III (betaglycan)	response to cytokine (68.2%; 1.258e-66), cell surface receptor signaling pathway (75.2%; 5.520e-56), cellular response to cytokine stimulus (59.7%; 1.165e-55), cytokine-mediated signaling pathway (50.4%; 2.784e-54), I-kappaB kinase/NF-kappaB signaling (27.1%; 3.979e-54)	145	45	916	4.1e-134	237.42	1382.42
	4	TCF7L1 (TCF3), TGF-beta receptor type I, TNF-R1 soluble, TNF-R2 soluble, G3P2, DcR3(TNFRSF6B), FasR(CD95), TGF-beta receptor type II, TNF-R2, TNF-R1, CD30(TNFRSF8), TGF-beta receptor type III (betaglycan)	response to cytokine (68.4%; 2.597e-59), I-kappaB kinase/NF-kappaB signaling (30.7%; 2.584e-56), regulation of immune system process (72.8%; 1.074e-55), cell surface receptor signaling pathway (78.1%; 6.534e-54), positive regulation of nitrogen compound metabolic process (84.2%; 2.631e-53)	130	42	901	1.87e-125	234.41	1360.66
	5	PAX5, TGF-beta receptor type I, CSF2RA, IL-12RB1, TNF-R1 soluble, IL23R, TNF-R2 soluble, G3P2, IL-23 receptor, DcR3(TNFRSF6B), GM-CSF receptor, TNF-R2, TNF-R1, CD30(TNFRSF8), CSF2RB, TGF-beta receptor type III (betaglycan)	response to cytokine (73.4%; 9.381e-65), I-kappaB kinase/NF-kappaB signaling (31.2%; 6.150e-55), cytokine-mediated signaling pathway (56.0%; 1.007e-54), cell surface receptor signaling pathway (79.8%; 3.334e-54), cellular response to cytokine stimulus (64.2%; 6.872e-54)	124	39	897	2.06e-115	223.03	1344.28
	Network list: Transcription Regulation
	1	AML1 (RUNX1)	regulation of immune system process (65.6%; 1.288e-13), regulation of cytokine production (46.9%; 2.524e-12), cell activation (53.1%; 2.831e-12), leukocyte activation (50.0%; 4.175e-12), T cell activation (34.4%; 4.843e-12)	32	31	0	2.53e-114	343.43	343.43
	2	TAL1	immune system process (78.6%; 7.562e-13), defense response to other organism (53.6%; 1.603e-11), response to other organism (60.7%; 2.888e-11), response to external biotic stimulus (60.7%; 2.974e-11), response to biotic stimulus (60.7%; 4.028e-11)	28	28	0	2.72e-104	331.61	331.61
	3	GATA-1	regulation of protein modification process (75.9%; 5.390e-16), regulation of protein phosphorylation (69.0%; 3.605e-15), regulation of immune system process (72.4%; 5.884e-15), immune system process (82.8%; 7.569e-15), response to external stimulus (82.8%; 8.092e-15)	29	28	0	7.88e-103	325.84	325.84
	4	CREB1	positive regulation of establishment of protein localization (51.9%; 1.406e-14), regulation of cytokine production (55.6%; 9.660e-14), positive regulation of protein transport (48.1%; 1.627e-13), positive regulation of protein secretion (40.7%; 1.628e-12), positive regulation of transport (59.3%; 2.745e-12)	27	26	0	3.16e-95	313.57	313.57
	5	ETS1	immune system process (74.1%; 5.621e-11), cell activation (51.9%; 3.759e-10), T cell activation (33.3%; 6.063e-10), leukocyte activation (48.1%; 8.119e-10), leukocyte differentiation (37.0%; 8.267e-10)	27	26	0	3.16e-95	313.57	313.57
